# Supplementary material for: Regional lymph node involvement and outcomes in appendiceal neuroendocrine tumors: a SEER database analysis
Source: PubMed Central journal article supplement (PMC5725113; doi:10.18632/oncotarget.20362), 2017-08-19
Supplement: oncotarget-08-99541-s001.pdf [file oncotarget-08-99541-s001.pdf]

## Regional lymph node involvement and outcomes in appendiceal neuroendocrine tumors: a SEER database analysis

### SUPPLEMENTARY MATERIALS

**Supplementary Table 1: Frequency of appendiceal neuroendocrine tumor histologies in surveillance, epidemiology, and end results data (date of diagnosis 1988–2012)**

| Tumor type       | Histology Code | Definition                                    | N   |
|------------------|----------------|-----------------------------------------------|-----|
| WDNET<br>(n=860) | 8240/3         | Neuroendocrine tumor, low grade               | 643 |
|                  | 8241/3         | Enterochromaffin cell carcinoid               | 14  |
|                  | 8246/3         | Neuroendocrine carcinoma, NOS (Grade 1 and 2) | 188 |
|                  | 8249/3         | Neuroendocrine tumor, grade 2                 | 15  |
| PDNEC<br>(n=26)  | 8013/3         | Large cell neuroendocrine carcinoma           | *   |
|                  | 8041/3         | Small cell carcinoma, NOS                     | *   |
|                  | 8246/3         | Neuroendocrine carcinoma, NOS (Grade 3 and 4) | *   |
| MHT<br>(n=1659)  | 8243/3         | Goblet cell carcinoid                         | 911 |
|                  | 8244/3         | Mixed adenoneuroendocrine carcinoma           | 247 |
|                  | 8245/3         | Adenocarcinoid tumor                          | 501 |

Abbreviations: WDNET: well-differentiated neuroendocrine tumor; PDNEC: poorly differentiated neuroendocrine carcinoma; MHT: mixed histology tumor; NOS: not otherwise specified \* In compliance with SEER Program Data Use-Agreement, the small numbers of cases with PDNEC are not reported.
